# Supplementary material for: Quantification of Changes in Rice Production for 2003–2019 with MODIS LAI Data in Pursat Province, Cambodia
Source: MDPI journal article supplement (doi:10.3390/rs13101971), 2021-05-18
Supplement: s1 [file s1]

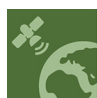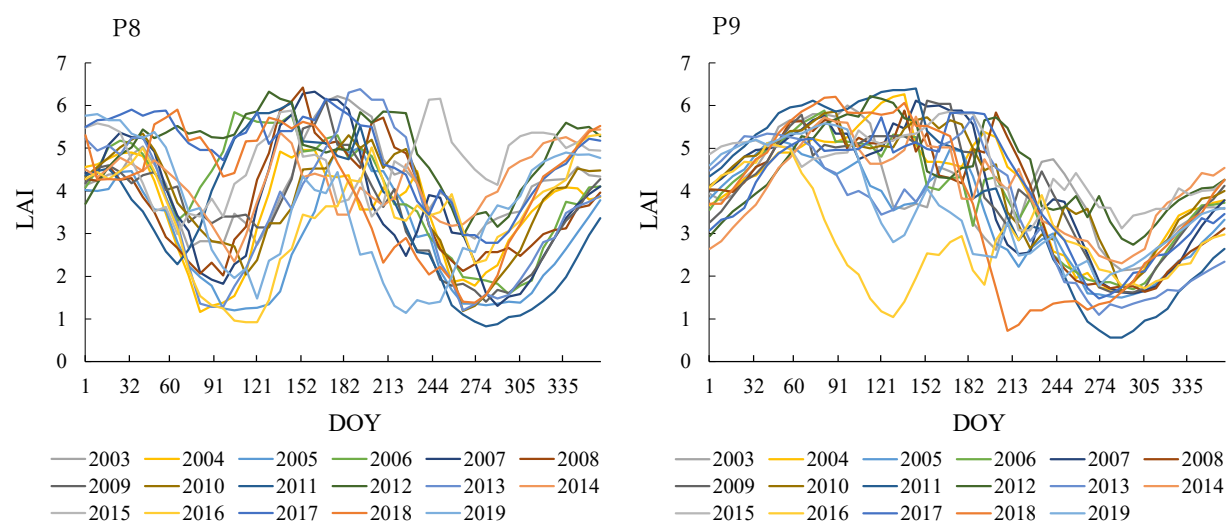

**Figure S1.** Annual LAI transitions for each year at P8 and P9. LAI decreases once in mid-dry season (around DOY 90) and late-rainy season (around DOY 274) at P8, while that decreases only once in late rainy season at P9. The difference in LAI may be caused by that in vegetation type reflected with water condition.
